# Supplementary material for: Structure-function analysis of Hmo1 unveils an ancestral organization of HMG-Box factors involved in ribosomal DNA transcription from yeast to human
Source: PubMed Central journal article supplement — Nucleic Acids Res. 2013 Sep 9;41(22):10135–49. doi: 10.1093/nar/gkt770 (PMC3905846; doi:10.1093/nar/gkt770), 2013-09-09

## Supplementary legends

### Supplementary figure 1: **UBF1 expression results in an increased nucleolar DFC.**

The internal nuclear structure was analyzed using cryo-fixation so as to circumvent the large structural alterations resulting from chemical fixation. Yeast nucleolus was described to contain three distinct sub domains: the fibrillar centers (FCs), the dense fibrillar component (DFC) and the granular component (GC) (51). In human cells, UBF is enriched in both the DFC and the FC (44). The existence of distinct FCs in yeast was questioned, suggesting that FC and DFC would be one single fibrillar structure (52). Moreover, FCs are rarely observed in sections, and were not taken into account in our analysis. DFC corresponds to nascent precursor ribosomal RNAs, with a high concentration of Nop1, (51). The GC comprises late ribosomal precursors as shown by Rlp7 localization (53). **A** Ultrastructural study of cryo-fixed, cryo-substituted wild-type budding yeast cells with or without UBF1 expression. UBF1 expression in yeast increases nucleolar size (see also Figure 1) and DFC sub-nucleolar compartment. Representative sections of the nuclei are depicted, with manual segmentation of nucleus (black line), nucleolus bounded by blue line and Dense Fibrillar Component (DFC) by red line. **B** Quantification of ultrastructural morphological alteration upon UBF1 expression. Nucleolar area normalized by nuclear surface is estimated by manual segmentation on EM sections (n=20). Nucleolar expansion caused by UBF1 expression appears to be largely a consequence of DFC enlargement.

### Supplementary figure 2: **Expression of UBF1 and Hmo1 deletion constructs in budding yeast.**

**A:** Detection of UBF1 C-terminal truncation from a yeast extract. Western analysis was performed on crude yeast extract of wild type strain containing pRS425 derivatives: empty

plasmid (-), UBF1 box1 or UBF1 box1-2. PGK detection is used as loading control. **B** Detection of Hmo1 and derivatives. Whole cell extracts were prepared from *hmo1Δ* strains expressing the different Hmo1 variants. Note that using polyclonal antibody against UBF1 and Hmo1 proteins, the relative signal intensity does not directly reflect abundance of the different deletion constructs.

Supplementary figure 3 **Localization of untagged Hmo1 and Hmo1 lacking C-terminal domain**

*hmo1Δ* mutant strains carrying plasmid expressing either Hmo1 (upper Panel), the truncated form Hmo1ΔC (mid panel) or containing the empty vector (lower panel) were fixed and incubated with antibody serum against Hmo1. Fluorescence detection was performed using Texas Red conjugated secondary antibody. Nucleoplasm DNA was stained with DAPI. Scale Bar = 5 μm.

## Supplementary tables

### Supplementary table 1: Yeast strains used in this study

| Referred as                     | strain    | Genotype                                                                                                                               | source    |
|---------------------------------|-----------|----------------------------------------------------------------------------------------------------------------------------------------|-----------|
| <i>Wild type</i><br>(Figure 1A) | BMA64-1a  | <i>MATa leu2-3,112 his3-11,15 trp1 ade2-1 ura3-1</i>                                                                                   | (54)      |
| <i>Wild-type</i><br>(Figure 1B) | OGP069-1a | <i>MATa leu2-3, 112 his3-11,15 trp1-Δ can1-100, ade2-1, ura3-52 HMO1 ::CFP-TRP1</i><br>+ <i>pUNI100-mRFP-NOPI (mRFP-NOPI LEU2 CEN)</i> | (14)      |
| <i>Wild-type</i><br>(Figure 1C) | TMS5-8d   | <i>MATa leu2Δ0, ura3Δ0, ade2-801, lys2-801, LYS2::TETR-GFP, nup49-Δ::HPH-MX6 +pASZ11-NupNop(ADE2 GFP-NUP49 mCherry-NOPI)</i>           | This work |
| <i>Wild-type</i><br>(Figure 2B) | BY4741    | <i>MATa his3-1 leu2-0 met15-0 ura3-0</i>                                                                                               | euroscarf |
| <i>hmo1Δ rpa49Δ</i>             | YAB9-1A   | <i>MATa his31 leu20 met150 ura30 hmo1::PrNAT-TetR-VP16 rpa49-::KANMX4 + pGID-HMO1 (TetO-CEN URA3 MET15 HMO1)</i>                       | (14)      |
| <i>hmo1Δ rps23bΔ</i>            | YAB5-1A   | <i>MATa his31 leu20 met150 ura30 hmo1::PrNAT-TetR-VP16 rps23b-::KANMX4 + pGID-HMO1 (TetO-CEN URA3 MET15 HMO1)</i>                      | (24)      |
| <i>Sp-Wild type</i>             | TG11      | <i>ade6-M210 ura4-Δ18 leu1-32, mating type h-</i>                                                                                      | (55)      |
| <i>Sp-rpa49Δ</i>                | BENSP2-1A | <i>ade6-M210 ura4-Δ18 leu1-32, rpa51::URA4 h+</i>                                                                                      | This work |
| <i>Sp-hmo1Δ</i>                 | BENSP3-1A | <i>ade6-M210 ura4-Δ18 leu1-32, SPBC28F2.11::KANMX44 h-</i>                                                                             | This work |
| <i>hmo1Δ</i>                    | Hmo1-Δ    | <i>MATa his3-1 leu2-0 met15-0 ura3-0 Hmo1::KAN</i>                                                                                     | euroscarf |
| <i>hmo1Δ rpa34Δ</i>             | SL7-4A    | <i>MATa rpa34-D::HIS3 ura3 ade2-1 lys2-801 his3-D200 trp1-D hmo1-D::URA3 leu2</i>                                                      | (14)      |
| <i>wild type</i>                | TG12      | <i>ade6-M210 ura4-Δ18 leu1-32, mating type h+</i>                                                                                      | (55)      |
| <i>rpa49Δ-25 copies</i>         | BEN26     | <i>MATa leu2-3,112 ura3-1 his3-11 trp1-1 ade2-1 can1-100 fob1-Δ::HIS3 rpa49::HPH rDNA copy number 25</i>                               | This work |

**Supplementary table 2: Plasmids used in this study**

| Name                   | Description                                                                                                                                                                                                                                                                                                                                         | Source                      |
|------------------------|-----------------------------------------------------------------------------------------------------------------------------------------------------------------------------------------------------------------------------------------------------------------------------------------------------------------------------------------------------|-----------------------------|
| pFL44-Hmo1             | Hmo1 over-expression                                                                                                                                                                                                                                                                                                                                | (14)                        |
| pUN100-mCherry nop1    | Expression of mCherry Nop1 fusion protein                                                                                                                                                                                                                                                                                                           | (16)                        |
| pASZ11-CFP-NUP49       | Expression of CFP-Nup49 fusion protein                                                                                                                                                                                                                                                                                                              | (16)                        |
| pUN100-CFP-NOP1        | Expression of CFP Nop1 fusion protein                                                                                                                                                                                                                                                                                                               | (53)                        |
| pRS423-pPGK            | Gateway destination vector, <i>HIS3</i> gene                                                                                                                                                                                                                                                                                                        | (16)                        |
| pRS425-pPGK            | Gateway destination vector, <i>LEU2</i> gene                                                                                                                                                                                                                                                                                                        | (16)                        |
| mRFP-NOP1              | pUN100-mRFP-NOP1 was constructed by allowing homologous recombination of the PCR-product derived pFA6-mRFP-KANMX6 with the SphI-cut vector pUN100-CFP-NOP1                                                                                                                                                                                          | This work                   |
| pEYFP-C1-UBF1          | UBF1 cDNA                                                                                                                                                                                                                                                                                                                                           | Gift From<br>M.F. O'Donohue |
| pEYFP-C1-UBF2          | UBF2 cDNA                                                                                                                                                                                                                                                                                                                                           | Gift from<br>M.F. O'Donohue |
| pENTR- eYFP-hUBF1      | pEYFP-C1-UBF1 was digested with <i>AfeI</i> and <i>AvrII</i> generating an eYFP-UBF1 fragment which was cloned into <i>HincII-XbaI</i> digested pENTR3C vector (invitrogen). Secondly this plasmid was shortened by the <i>SfiI-BamHI</i> fragment, generating pENTR3C-EYFP-C1-UBF1                                                                 | This work                   |
| pENTR- eYFP-hUBF2      | pENTR3C-EYFP-C1-UBF2 was constructed as pENTR- eYFP-hUBF, but using pEYFP-C1-UBF2                                                                                                                                                                                                                                                                   | This work                   |
| pENTR-UBF1             | pENTR3C-UBF1 was generated by cutting out the coding sequence of eYFP from pENTR- eYFP-hUBF1 using <i>HincII</i> and <i>XmnI</i>                                                                                                                                                                                                                    | This work                   |
| pENTR-UBF2             | pENTR3C-UBF2 was generated by cutting out the coding sequence of eYFP from pENTR- eYFP-hUBF2 using <i>HincII</i> and <i>XmnI</i>                                                                                                                                                                                                                    | This work                   |
| pENTR-UBF1-box1        | BP reaction with pDONR201 and PCR-generated fragment amplified using oligonucleotides 883-888 and pENTR-UBF1 as matrix.                                                                                                                                                                                                                             | This work                   |
| pENTR-UBF1-box1-2      | BP reaction with pDONR201 and PCR-generated fragment amplified using oligonucleotides 883-887 and pENTR-UBF1 as matrix.                                                                                                                                                                                                                             | This work                   |
| pRS425pPGK-UBF1        | LR gateway reaction with prs425-pPGK and pENTR-UBF1                                                                                                                                                                                                                                                                                                 | This work                   |
| pRS425pPGK-UBF2        | LR gateway reaction with prs425-pPGK and pENTR-UBF2                                                                                                                                                                                                                                                                                                 | This work                   |
| pRS425pPGK-UBF1-box1   | LR gateway reaction with prs425-pPGK and pENTR-UBF1 box1                                                                                                                                                                                                                                                                                            | This work                   |
| pRS425pPGK-UBF1-box1-2 | LR gateway reaction with prs425-pPGK and pENTR-UBF1 box1-2                                                                                                                                                                                                                                                                                          | This work                   |
| Peb5-YFP-UBF1-box1     | LR gateway reaction with peb5 and pENTR-UBF1 box1                                                                                                                                                                                                                                                                                                   | This work                   |
| Peb5-YFP-UBF1-box1-2   | LR gateway reaction with peb5 and pENTR-UBF1 box1-2                                                                                                                                                                                                                                                                                                 | This work                   |
| Peb5-YFP-UBF1          | LR gateway reaction with peb5 and pENTR-UBF1                                                                                                                                                                                                                                                                                                        | This work                   |
| Peb5-YFP-UBF2          | LR gateway reaction with peb5 and pENTR-UBF2                                                                                                                                                                                                                                                                                                        | This work                   |
| pENTR-Hmo1             | BP reaction with pDONR201 and PCR-generated fragment amplified using oligonucleotides 899-898 and pfl44-Hmo1.                                                                                                                                                                                                                                       | This work                   |
| pENTR-BoxA             | BP reaction with pDONR201 and PCR-generated fragment amplified using oligonucleotides 899-879 and pfl44-Hmo1.                                                                                                                                                                                                                                       | This work                   |
| pENTR-BoxAB            | BP reaction with pDONR201 and PCR-generated fragment amplified using oligonucleotides 899-880 and pfl44-Hmo1.                                                                                                                                                                                                                                       | This work                   |
| pENTR-Hmo1ΔC           | BP reaction with pDONR201 and PCR-generated fragment amplified using oligonucleotides 899-881 and pfl44-Hmo1.                                                                                                                                                                                                                                       | This work                   |
| pENTR-Hmo1ΔCR          | PCR Mutagenesis by overlap extension was achieved using PCR-generated fragment amplified using oligonucleotides 877-878 and 899-898 with pfl44-Hmo1 as template. Two overlapping fragments are fused together in a subsequent extension reaction using oligonucleotides 899-898, and cloned by BP reaction with pDONR201.                           | This work                   |
| pENTR-Hmo1ΔBoxA        | BP reaction with pDONR201 and PCR-generated fragment amplified using oligonucleotides 886-898 and pfl44-Hmo1.                                                                                                                                                                                                                                       | This work                   |
| pENTR-chimHMO1         | PCR Mutagenesis by overlap extension was achieved using PCR-generated fragment amplified using oligonucleotides 885-886 with pENTR-UBF1 as template and 886-898 with pfl44-Hmo1 as template. Two overlapping fragments are fused together in a subsequent extension reaction using oligonucleotides 885-898, and cloned by BP reaction in pDONR201. | This work                   |
| pRS423- pPGK-Hmo1      | LR reaction between prs423-pPGK and pENTR201-Hmo1                                                                                                                                                                                                                                                                                                   | This work                   |
| pRS423-pPGK-BoxA       | LR reaction between prs423-pPGK and pENTR201-BoxA                                                                                                                                                                                                                                                                                                   | This work                   |
| pRS423-pPGK-BoxAB      | LR reaction between prs423-pPGK and pENTR201-BoxAB                                                                                                                                                                                                                                                                                                  | This work                   |
| pRS423- pPGK-Hmo1ΔC    | LR reaction between prs423-pPGK and pENTR201-Hmo1ΔC                                                                                                                                                                                                                                                                                                 | This work                   |
| pRS423- pPGK-Hmo1ΔCR   | LR reaction between prs423-pPGK and pENTR201-Hmo1ΔCR                                                                                                                                                                                                                                                                                                | This work                   |
| pRS425- pPGK-Hmo1ΔBoxA | LR reaction between prs425-pPGK and pENTR201-Hmo1ΔBoxA                                                                                                                                                                                                                                                                                              | This work                   |
| pRS423-pPGK-chimHMO1   | LR gateway reaction with prs423-pPGK and pENTR201-chimHMO1                                                                                                                                                                                                                                                                                          | This work                   |
| peb5-Hmo1              | LR gateway reaction with peb5 and pENTR201-Hmo1                                                                                                                                                                                                                                                                                                     | This work                   |
| peb5-BoxA              | LR gateway reaction with peb5 and pENTR201-BoxA                                                                                                                                                                                                                                                                                                     | This work                   |
| peb5-BoxAB             | LR gateway reaction with peb5 and pENTR201-BoxAB                                                                                                                                                                                                                                                                                                    | This work                   |
| peb5-Hmo1ΔC            | LR gateway reaction with peb5 and pENTR201-Hmo1ΔC                                                                                                                                                                                                                                                                                                   | This work                   |
| peb5-Hmo1ΔCR           | LR gateway reaction with peb5 and pENTR201-Hmo1ΔCR                                                                                                                                                                                                                                                                                                  | This work                   |
| peb5-Hmo1ΔBoxA         | LR gateway reaction with peb5 and pENTR201-Hmo1ΔBoxA                                                                                                                                                                                                                                                                                                | This work                   |
| pENTR-SPBC28F2         | BP reaction with pDONR201 and PCR-generated fragment amplified using oligonucleotides 868-900 and genomic DNA of <i>S. pombe</i> .                                                                                                                                                                                                                  | This work                   |

|                   |                                                                                                                                                                                                                                                                                                                                      |           |
|-------------------|--------------------------------------------------------------------------------------------------------------------------------------------------------------------------------------------------------------------------------------------------------------------------------------------------------------------------------------|-----------|
| pENTR-SPAC57      | Splicing by overlap extension was achieved using PCR-generated fragment amplified using oligonucleotides 869-901 and 870-903 with genomic DNA of <i>S. pombe</i> as template. Two overlapping fragments are fused together in a subsequent extension reaction using oligonucleotides 869-903, and cloned by BP reaction in pDONR201. | This work |
| pENTR-SPC4G9      | BP reaction with pDONR201 and PCR-generated fragment amplified using oligonucleotides 866-867 and genomic DNA of <i>S. pombe</i> .                                                                                                                                                                                                   | This work |
| pENTR-SPAC10F6    | Splicing by overlap extension was achieved using PCR-generated fragment amplified using oligonucleotides 862-863 and 864-865 with genomic DNA of <i>S. pombe</i> as template. Two overlapping fragments are fused together in a subsequent extension reaction using oligonucleotides 862-865, and cloned by BP reaction in pDONR201. | This work |
| peb5-SPBC28F2     | LR gateway reaction with peb5 and pENTR-SPBC28F2                                                                                                                                                                                                                                                                                     | This work |
| peb5-SPAC57       | LR gateway reaction with peb5 and pENTR-SPAC57                                                                                                                                                                                                                                                                                       | This work |
| peb5-SPC4G9       | LR gateway reaction with peb5 and pENTR-SPC4G9                                                                                                                                                                                                                                                                                       | This work |
| peb5-SPAC10F6     | LR gateway reaction with peb5 and pENTR-SPAC10F6                                                                                                                                                                                                                                                                                     | This work |
| pRS425-SPBC28F2   | LR gateway reaction with prs425pPGK and pENTR- SPBC28F2                                                                                                                                                                                                                                                                              | This work |
| pRS425-SPAC57     | LR gateway reaction with prs425pPGK and pENTR-SPAC57                                                                                                                                                                                                                                                                                 | This work |
| pRS425-SPC4G9     | LR gateway reaction with prs425pPGK and pENTR-SPC4G9                                                                                                                                                                                                                                                                                 | This work |
| pRS425-SPAC10F6   | LR gateway reaction with prs425pPGK and pENTR-SPAC10F6                                                                                                                                                                                                                                                                               | This work |
| pENTR-HA-SBC28F2  | BP reaction between PCR product oligo 868-882 and pDnor201                                                                                                                                                                                                                                                                           | This work |
| pYN1003usds       | Deletion of SpRPA49 (RPA51)                                                                                                                                                                                                                                                                                                          | (43)      |
| Rep41             | <i>S. pombe</i> vector                                                                                                                                                                                                                                                                                                               | (16)      |
| Rep41-HA-SPBC28F2 | LR reaction between pENTR-HA-SPBC28F2 and rep41                                                                                                                                                                                                                                                                                      | This work |

**Supplementary table 3: Oligonucleotides used in this study**

| Name                | Sequence                                                                                          | N°  |
|---------------------|---------------------------------------------------------------------------------------------------|-----|
| attB1(10F6.08c)1    | ggggacaagttgtacaaaaagcaggcttaatggaaccctccatcatgatctatttccaaatcggaagaaataaatatcgccaaaagtgcgaag     | 862 |
| intron2(10F6.08c)1  | cgttgataatttgatttaataccttcggggaggaggaggagatggctcagagcgcctgtccaaattcg                              | 863 |
| Intron2(10F6.08c)2  | cgaattfggacagcgcctctgagccatctctctctctcccgaaaggtattaaaatacaaatcaacg                                | 864 |
| attB2(10F6.08c)2    | ggggaccactttgtacaagaaagctgggtgtaagcattagaggatctattaacaacgggtg                                     | 865 |
| AttB1(4G9.11c)1     | ggggacaagttgtacaaaaagcaggcttaatgcctctgtttgacgcaatgcctcttacc                                       | 866 |
| AttB2(4G9.11c)1     | ggggaccactttgtacaagaaagctgggtgtcatcgaatccggctcttccataaacttatcg                                    | 867 |
| AttB1(28f2.11)1     | ggggacaagttgtacaaaaagcaggcttaatggctcaaaactcaaccaactggaaaagatttctggttcttcacaaggtggcggaagc          | 868 |
| AttB1(57A10.09c)1   | ggggacaagttgtacaaaaagcaggcttaatccttagagccgcaaaatccagccgt                                          | 869 |
| Intron2(57A10.09c)2 | gccagctaggatctttgtggcgaagagtggaagagcttacaagcacagaacgtgagccatagcggaaaaagctcgtcaggacaag             | 870 |
| Hmoshort for        | aattaccaaaagagagaaatccaatacttaccacgatgatgatgcttcggaaaaag                                          | 877 |
| Hmoshort rev        | ctcttttccgaagatccatcatcatcgtgtaagtatttgatttctcttttgtaatt                                          | 878 |
| boxA Hmo            | ggggaccactttgtacaagaaagctgggtgtcaagcagcgataatagcatcttcatcatc                                      | 879 |
| boxAB Hmo           | ggggaccactttgtacaagaaagctgggtgtcataagtatttgatttctcttttgtaatt                                      | 880 |
| boxABlong hmo       | ggggaccactttgtacaagaaagctgggtgtcagctgtaaaactgaaaggaattggaaccgg                                    | 881 |
| C HA Spbc28F211     | ggggaccactttgtacaagaaagctgggtgagcgttaatcggaaactatgaggtacatagcgttaactggaacatcgatggtaattagcaa       | 882 |
| O attb1 UBF1        | ggggacaagttgtacaaaaagcaggcttaatgaaccggagaagccgactgccccacagac                                      | 883 |
| O UBF1DIM attb2     | ggggaccactttgtacaagaaagctgggtgttcttgagtttttgcctttgtaaggatttttaacatgttctgagcat                     | 884 |
| O UBF1DIM           | tgctctttggagcatttggatcacgttcgatttcttgagtttttgcctttgtaaggatttttaacat                               | 885 |
| O hmoDimless        | atgttaaaatccttacaagggcaaaaaactcaagaaatcgaacgtgatccaaatgctccaaggaagcca                             | 886 |
| UBF1-12 attb2       | ggggaccactttgtacaagaaagctgggtgtcactcactgatgttcagctctgggtgctt                                      | 887 |
| UBF1-1 attb2        | ggggaccactttgtacaagaaagctgggtgtcatttctggcattctgattaggctggg                                        | 888 |
| KAN SPB28F2 for     | cccgcacatcccgggtaggtcagccaccatttctgtatttgccatcgtattgaaagctttgatttattagaactttgaaatgtaaacgacggccagt | 889 |
| KAN SPBC28F2 rev    | aagcaatatttacagacattagcaacctgagtaataatagagagcactcaaacagcaatcaagcaaacactttgcccaggaaacagctatgaccatg | 890 |
| o 35S sp            | ctctttcaaccaccactcc                                                                               | 891 |
| o 18S sp            | catgcttaattcttgagac                                                                               | 892 |
| o ITS1 sp           | tgatagcttggcatgcaac                                                                               | 893 |
| o 5.8S sp           | gcgttctcatcgatgc                                                                                  | 894 |
| o 28S sp            | tcctgcgcttattgatagc                                                                               | 895 |
| o ITS2 sp           | tcctgcgcttattgatagc                                                                               | 895 |
| Attb2 Hmo1          | ggggaccactttgtacaagaaagctgggtgtcaatagaagagttggatttgccttctt                                        | 898 |
| Attb1 Hmo1          | ggggacaagttgtacaaaaagcaggcttaatgactacagatcctctgtcaaatggaag                                        | 899 |
| AttB2(28f2.11)1     | ggggaccactttgtacaagaaagctgggtgtcaatagaacactttggcgttaggggagtg                                      | 900 |
| intron1(57A10.09c)1 | ctcacgttctgtgcttgaagctcttccatctttgcccaaaagatcctagctggccaaaggtggcaacaggttctgttttca                 | 901 |
| AttB2(57A10.09)2    | ggggaccactttgtacaagaaagctgggtgtattctctttggcggcagcagcagcagcagg                                     | 903 |
| Rpa49(-504)Fo       | cat agt ttc tgg cat gac cc                                                                        | 649 |
| Rpa49(1701)Re       | gaa gaa tcc tgg tag tat gg                                                                        | 650 |
| 1am                 | tcgctgatgtcaccactac                                                                               | 291 |
| 1av                 | gttgcggccatctaccaga                                                                               | 292 |
| 3am                 | gcagtattgagaccatgagagtagca                                                                        | 295 |
| 3av                 | tccaaatgtaaaatggcctatcg                                                                           | 296 |
| 6am                 | aaagcagttgaaacaagttcga                                                                            | 301 |
| 6av                 | gactcttcaccggttggacg                                                                              | 302 |
| 10am                | aataataaaaactttcaacaacggatctct                                                                    | 309 |
| 10av                | cgatgattcacggaattctgc                                                                             | 310 |
| 11am                | ggtgtaaatccatctaaagctaaatatt                                                                      | 311 |
| 11av                | cacgtacttttcaactcttttcaaa                                                                         | 312 |
| 12am                | tatgaggtaaaagcgaatgattagagg                                                                       | 313 |
| 12av                | cacgttcaattaagtaacaaggacttct                                                                      | 314 |
| 13am                | ggaggagttacttttcttcaacagct                                                                        | 315 |
| 13av                | aaggtgctggccttcca                                                                                 | 316 |
| 16am                | atcattgtatacgacttagatgtacaacg                                                                     | 321 |
| 16av                | aacaaatcagacaacaaagccttaac                                                                        | 322 |
| 17am                | tacgatgagatgatagtgtaagagtg                                                                        | 323 |
| 17av                | tcctttcaaccatctttgcaa                                                                             | 324 |
| 18am                | ctcatttctatagttaacaggacatgc                                                                       | 325 |
| 18av                | ttcactgttcttcttacttcttctgg                                                                        | 326 |
| 19am                | taacagatatggaatggtggcg                                                                            | 327 |
| 19av                | tgccgattacactatagatcg                                                                             | 328 |
| 20am                | gtacatataagtagtagcaaccaatgag                                                                      | 329 |
| 20av                | accattcgattcagaaaaattcg                                                                           | 330 |

### Supplementary references :

14. Gadal, O., Labarre, S., Boschiero, C. and Thuriaux, P. (2002) *Hmo1*, an HMG-box protein, belongs to the yeast ribosomal DNA transcription system. *Embo J*, **21**, 5498-5507.
16. Albert, B., Leger-Silvestre, I., Normand, C., Ostermaier, M.K., Perez-Fernandez, J., Panov, K.I., Zomerdijk, J.C., Schultz, P. and Gadal, O. (2011) RNA polymerase I-specific subunits promote polymerase clustering to enhance the rRNA gene transcription cycle. *J Cell Biol*, **192**, 277-293.
24. Berger, A.B., Decourty, L., Badis, G., Nehrbass, U., Jacquier, A. and Gadal, O. (2007) *Hmo1* Is Required for TOR-Dependent Regulation of Ribosomal Protein Gene Transcription. *Mol Cell Biol*, **27**, 8015-8026.
43. Nakagawa, K., Hisatake, K., Imazawa, Y., Ishiguro, A., Matsumoto, M., Pape, L., Ishihama, A. and Nogi, Y. (2003) The fission yeast RPA51 is a functional homolog of the budding yeast A49 subunit of RNA polymerase I and required for maximizing transcription of ribosomal DNA. *Genes Genet Syst*, **78**, 199-209.
44. Roussel, P., Andre, C., Masson, C., Geraud, G. and Hernandez-Verdun, D. (1993) Localization of the RNA polymerase I transcription factor hUBF during the cell cycle. *J Cell Sci*, **104 ( Pt 2)**, 327-337.
51. Léger-Silvestre, I., Trumtel, S., Noaillac-Depeyre, J. and Gas, N. (1999) Functional compartmentalization of the nucleus in the budding yeast *Saccharomyces cerevisiae*. *Chromosoma*, **108**, 103-113.
52. Thiry, M. and Lafontaine, D.L. (2005) Birth of a nucleolus: the evolution of nucleolar compartments. *Trends Cell Biol*, **15**, 194-199.
53. Gadal, O., Strauss, D., Petfalski, E., Gleizes, P.E., Gas, N., Tollervey, D. and Hurt, E. (2002) Rlp7p is associated with 60S preribosomes, restricted to the granular component of the nucleolus, and required for pre-rRNA processing. *J Cell Biol*, **157**, 941-951.
54. Baudin, A., Ozier-Kalogeropoulos, O., Denouel, A., Lacroute, F. and Cullin, C. (1993) A simple and efficient method for direct gene deletion in *Saccharomyces cerevisiae*. *Nucleic Acids Res*, **21**, 3329-3330.
55. Pelloquin, L., Belenguer, P., Menon, Y., Gas, N. and Ducommun, B. (1999) Fission yeast *Msp1* is a mitochondrial dynamin-related protein. *J Cell Sci*, **112 ( Pt 22)**, 4151-4161.

# Albert\_Suppl. Fig. 1

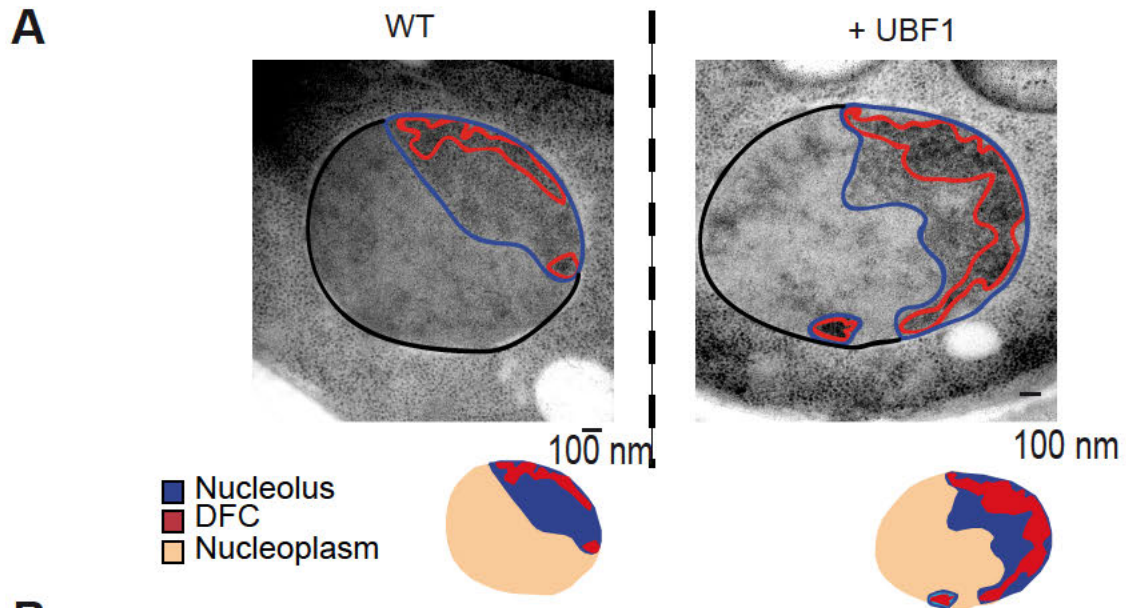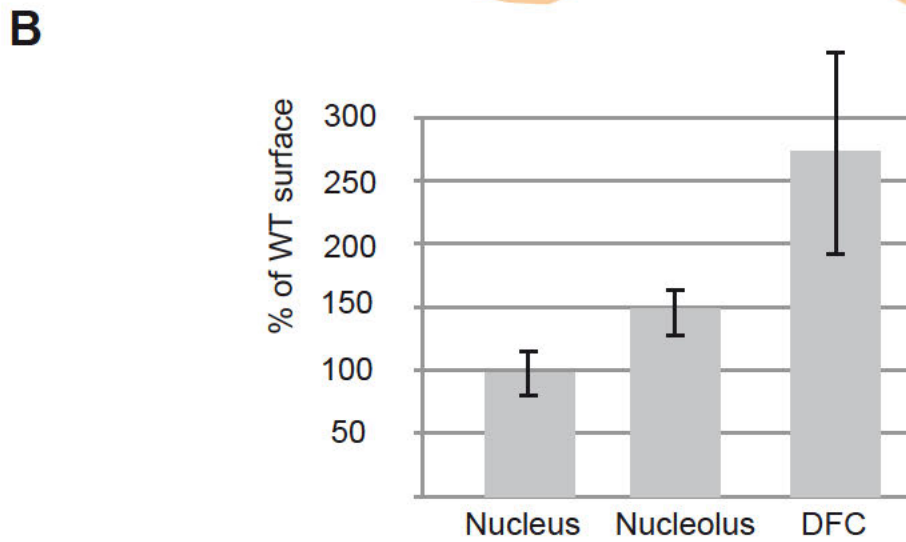



**A**

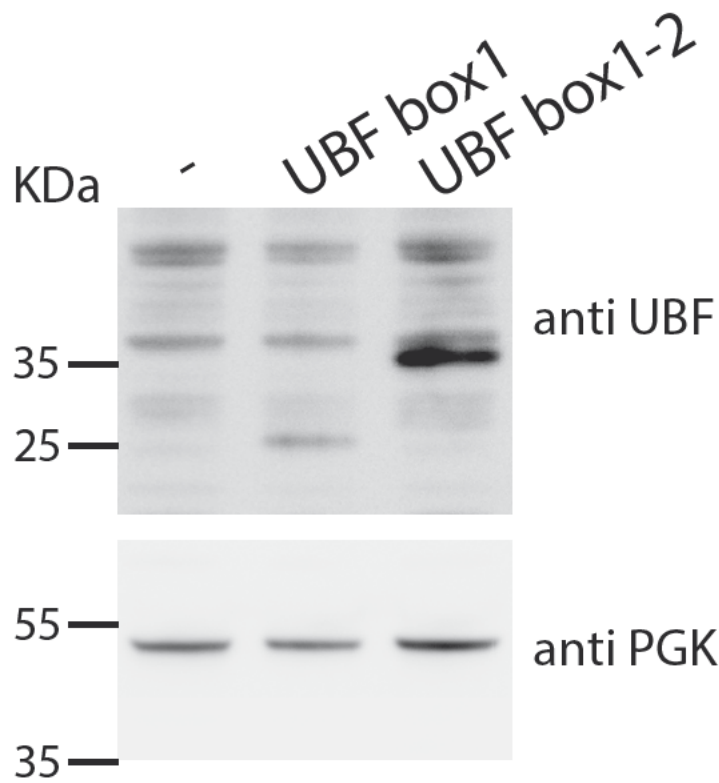

**B**

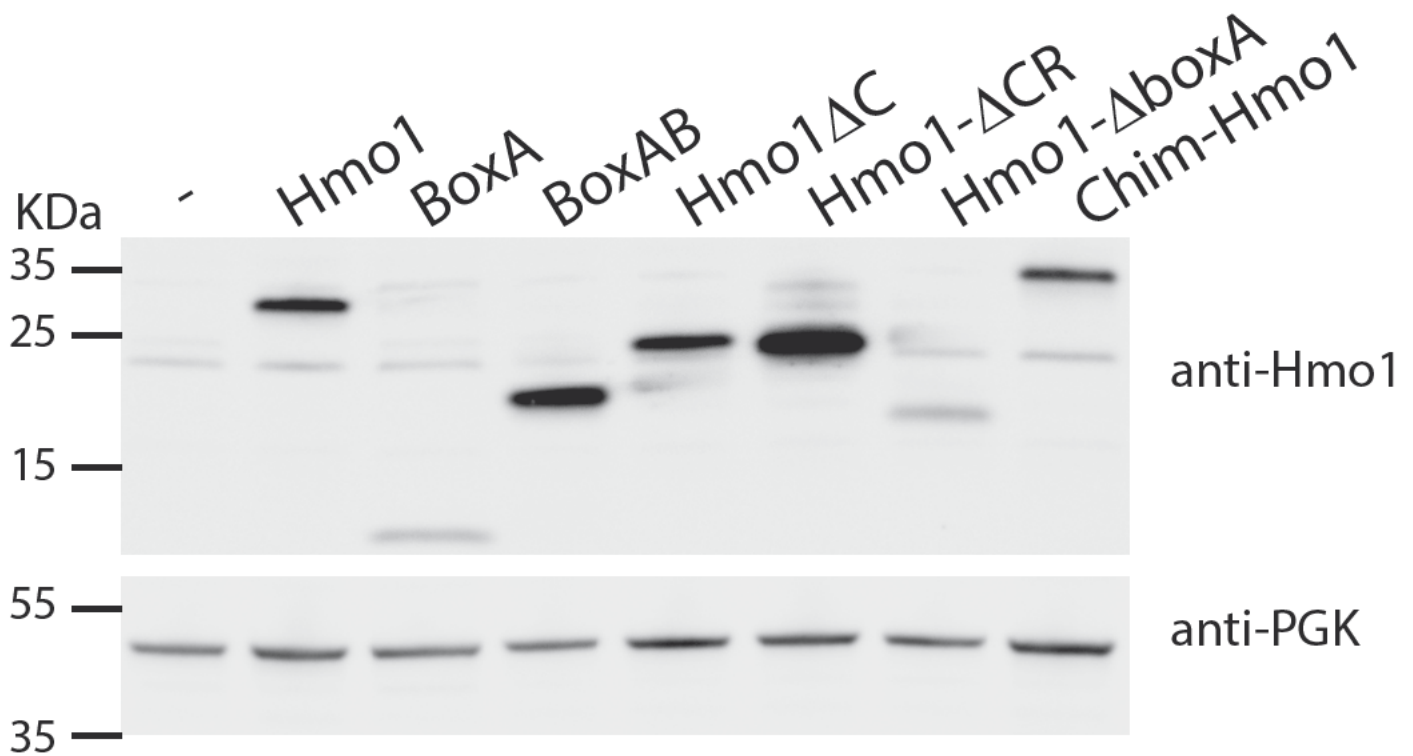

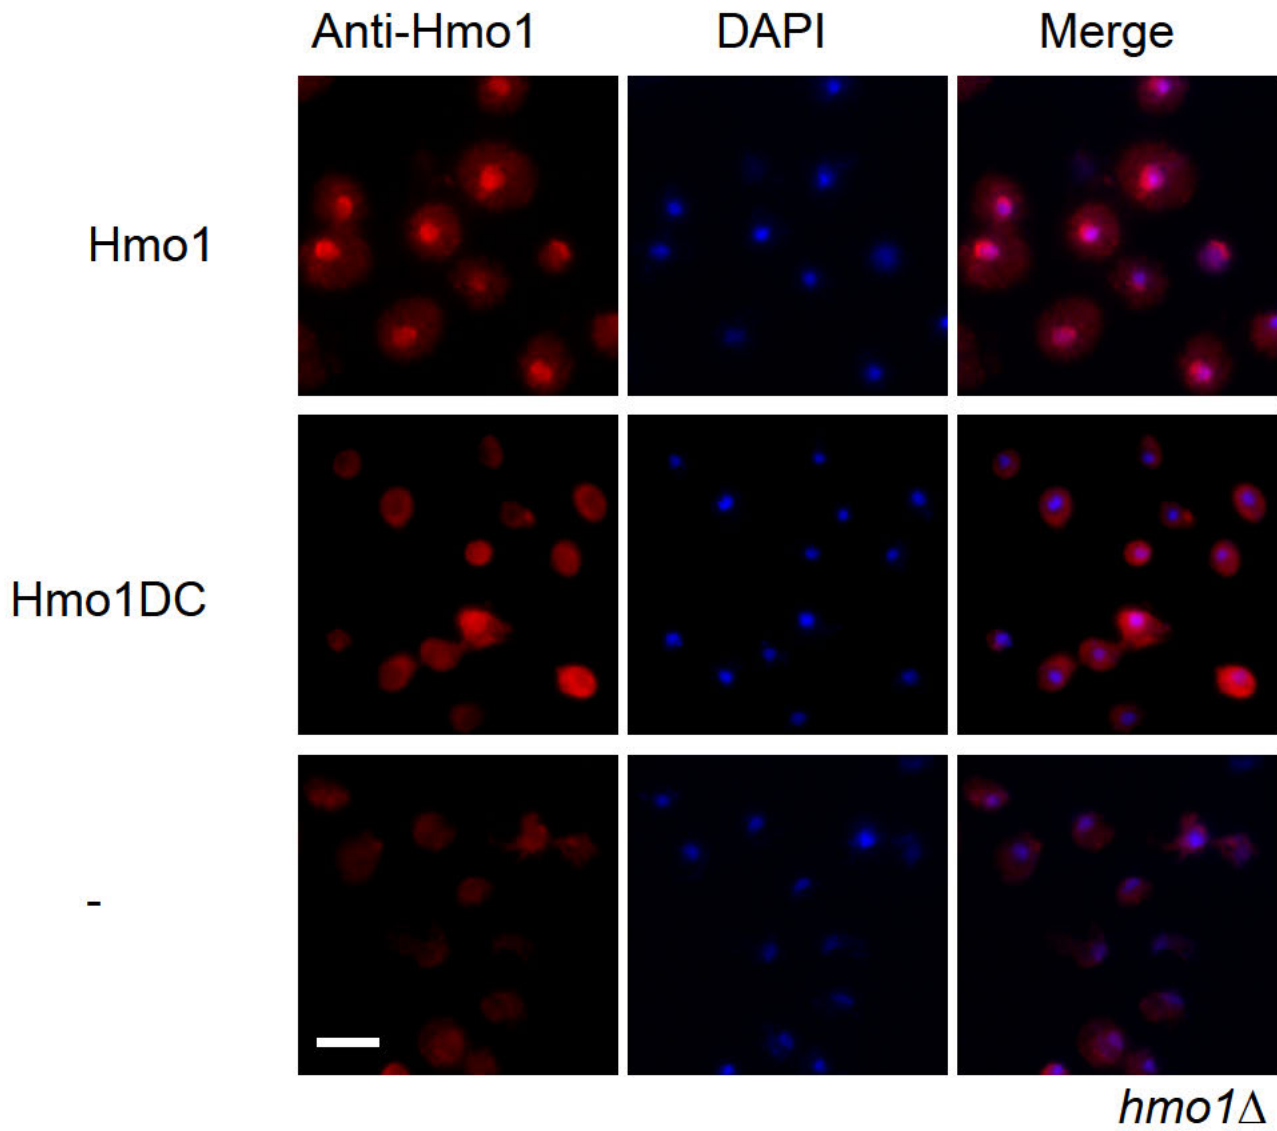

Supplement: supp_gkt770_nar-00493-m-2013-File011.pdf [file supp_gkt770_nar-00493-m-2013-File011.pdf]
